# Supplementary material for: Divergent Synthesis of Quinolone Natural Products from Pseudonocardia sp. CL38489
Source: PubMed Central journal article supplement (PMC5215369; doi:10.1002/ejoc.201601195), 2016-11-15

**SUPPORTING INFORMATION**

**DOI:** 10.1002/ejoc.201601195

**Title:** Divergent Synthesis of Quinolone Natural Products from *Pseudonocardia* sp. CL38489

**Author(s):** Stephen M. Geddis, Laura Carro, James T. Hodgkinson, David R. Spring\*

|                                                                                                                                                                                                             |    |
|-------------------------------------------------------------------------------------------------------------------------------------------------------------------------------------------------------------|----|
| General Experimental .....                                                                                                                                                                                  | 2  |
| ( <i>E</i> )-3,7-dimethylocta-2,6-dienal (10) .....                                                                                                                                                         | 2  |
| ( <i>E</i> )-5,9-dimethyldeca-4,8-dien-1-yn-3-ol (11) .....                                                                                                                                                 | 3  |
| ( <i>E</i> )-((5,9-dimethyldeca-4,8-dien-1-yn-3-yl)oxy)trisopropylsilane (12) .....                                                                                                                         | 3  |
| ( <i>E</i> )-3-(methoxymethoxy)-5,9-dimethyldeca-4,8-dien-1-yne (13) .....                                                                                                                                  | 4  |
| ( <i>E</i> )-1-(2-bromophenyl)-4-(methoxymethoxy)-6,10-dimethylundeca-5,9-dien-2-yn-1-one (14) ....                                                                                                         | 4  |
| (2 <i>Z</i> ,5 <i>E</i> )-1-(2-bromophenyl)-4-(methoxymethoxy)-6,10-dimethyl-3-(methylamino)undeca-2,5,9-trien-1-one (15) .....                                                                             | 5  |
| ( <i>E</i> )-2-(1-(methoxymethoxy)-3,7-dimethylocta-2,6-dien-1-yl)-1-methylquinolin-4( <i>1H</i> )-one (16) .                                                                                               | 6  |
| ( <i>E</i> )-2-(1-hydroxy-3,7-dimethylocta-2,6-dien-1-yl)-1-methylquinolin-4( <i>1H</i> )-one (5) & ( <i>E</i> )-2-(3-hydroxy-3,7-dimethylocta-1,6-dien-1-yl)-1-methylquinolin-4( <i>1H</i> )-one (6) ..... | 6  |
| ( <i>E</i> )-2-(3,7-dimethylocta-2,6-dien-1-yl)-3-methylquinolin-4( <i>1H</i> )-one (1) .....                                                                                                               | 7  |
| ( <i>E</i> )-2-(3,7-dimethylocta-2,6-dien-1-yl)-1,3-dimethylquinolin-4( <i>1H</i> )-one (4) .....                                                                                                           | 8  |
| ( <i>E</i> )-2-(5-(3,3-dimethyloxiran-2-yl)-3-methylpent-2-en-1-yl)-1,3-dimethylquinolin-4( <i>1H</i> )-one (8) .....                                                                                       | 9  |
| ( <i>E</i> )-2-(3,7-dimethylocta-2,6-dien-1-yl)-3-methyl-1-((methylthio)methyl)quinolin-4( <i>1H</i> )-one (7) .....                                                                                        | 10 |
| References .....                                                                                                                                                                                            | 10 |
| <sup>1</sup> H and <sup>13</sup> C spectra .....                                                                                                                                                            | 11 |

## General Experimental

$^1\text{H}$  and  $^{13}\text{C}$  nuclear magnetic resonance (NMR) spectra were recorded using an internal deuterium lock at ambient probe temperature on a Bruker DPX 400 (400 MHz), Bruker Avance 400 QNP Ultrashield (400 MHz), Bruker Avance 500 BB ATM (500 MHz) or Bruker Avance 500 Dual Cryo (500 MHz) spectrometer. Chemical shifts ( $\delta$ ) are quoted in ppm relative to the residual non-deuterated solvent signal. Data are reported as follows: chemical shift, integration, multiplicity (s, singlet; d, doublet; t, triplet; q, quartet; br, broad; app, apparent; or a combination of these, e.g. br s or dd), coupling constants ( $J$  in Hz), and assignment. The numbering system used in the assignments does not necessarily follow the IUPAC convention. Assignment of the spectra is supported by DEPT-135 or COSY, HSQC, HMBC and NOESY experiments where necessary. NMR spectra were acquired at 300 K unless otherwise indicated. All coupling constants are reported to the nearest 0.5 Hz. Infra-red (IR) spectra were recorded neat on a Perkin Elmer Spectrum One FT-IR spectrophotometer fitted with an attenuated total reflectance (ATR) sampling accessory. Selected absorption maxima ( $\nu$  max) are reported in wavenumbers ( $\text{cm}^{-1}$ ). Melting points were measured using a Büchi B545 meltingpoint apparatus and are uncorrected. High resolution mass spectrometry (HRMS) was carried out using a Waters LCT Premier Time of Flight (ToF) mass spectrometer or Micromass Quadrupole-Time of Flight (Q-ToF) mass spectrometer. Reported mass values are within the error limits of  $\pm 5$  ppm. Analytical HPLC was run on an Agilent 1260 Infinity using a Supelcosil ABZ+PLUS column (150 mm  $\times$  4.6 mm, 3  $\mu\text{m}$ ) eluting with a linear gradient system (solvent A: water, solvent B: acetonitrile) over 15 min at a flow rate of 1 mL/min. Semi-preparative HPLC was run on an Agilent 1260 Infinity using a Supelcosil ABZ+PLUS column (250 mm  $\times$  21.2 mm, 5  $\mu\text{m}$ ) eluting with a linear gradient system (solvent A: water, solvent B: acetonitrile) over 20 min at a flow rate of 20 mL/min. HPLC was monitored by UV absorbance at 220 and 254 nm. Analytical HPLC was run on an Agilent 1260 Infinity using a Supelcosil ABZ+PLUS column (150 mm  $\times$  4.6 mm, 3  $\mu\text{m}$ ) eluting with a linear gradient system (solvent A: 0.05% (v/v) TFA in water, solvent B: 0.05% (v/v) TFA in acetonitrile) over 15 min at a flow rate of 1 mL/min.

### (*E*)-3,7-dimethylocta-2,6-dienal (10)

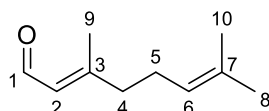

Following the procedure of Lautens et al.<sup>[1]</sup> A slurry of geraniol (3.00 mL, 17.1 mmol) and  $\text{MnO}_2$  (85% purity, 17.5 g, 171 mmol) in  $\text{CH}_2\text{Cl}_2$  (15 mL) was stirred at RT for 48 h, then filtered through celite, rinsing with  $\text{CH}_2\text{Cl}_2$ . The filtrate was dried ( $\text{MgSO}_4$ ) and the solvent was removed *in vacuo*. The crude product was purified by flash column chromatography ( $\text{SiO}_2$ , 10%  $\text{Et}_2\text{O}$ , Pet. Ether 40-60) to give 5-iodo-2-methylpent-2-ene as a colourless oil (1.89 g, 12.4 mmol, 73%).

**<sup>1</sup>H NMR** (500 MHz, CDCl<sub>3</sub>): δ = 10.00 (1H, d, *J* = 8.2 Hz, H-1), 5.90-5.87 (1H, m, H-2), 5.09-5.05 (1H, m, H-6), 2.26-2.19 (2H, m, H-4 & H-5), 2.17 (3H, s, H-9), 1.69 (3H, s, H-8), 1.61 (3H, s, H-10); **<sup>13</sup>C NMR** (125 MHz, CDCl<sub>3</sub>): δ = 191.3 (C-1), 163.9 (C-3), 132.9 (C-7), 127.4 (C-7), 122.5 (C-6), 40.6 (C-4), 25.7 (C-8 or C-5), 25.6 (C-8 or C-5), 17.7 (C-9 or C-10), 17.6 (C-9 or C-10); ν [cm<sup>-1</sup>] (neat): 1671 (s, C=O aldehyde); analytical data consistent with that previously published.<sup>[1]</sup>

**(E)-5,9-dimethyldeca-4,8-dien-1-yn-3-ol (11)**

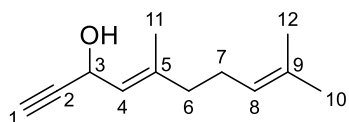

To a solution of **10** (1.23 g, 8.08 mmol) in THF (40 mL) at -78 °C was added dropwise ethynylmagnesium bromide (0.5 M in THF, 32.4 mL, 16.2 mmol). The mixture was allowed to return to RT, then stirred for 2 h. Sat. aq. NH<sub>4</sub>Cl (20 mL) was added dropwise, followed by extraction with EtOAc (3 x 20 mL). The combined organic extracts were washed with brine (30 mL), dried (MgSO<sub>4</sub>), then concentrated *in vacuo*. The crude product was purified by flash column chromatography (SiO<sub>2</sub>, 20% Et<sub>2</sub>O/ pet. ether 40-60) to give the title compound as a yellow oil (1.18g, 6.30 mmol, 78%)

**<sup>1</sup>H NMR** (500 MHz, CDCl<sub>3</sub>): δ = 5.42-5.39 (1H, m, H-4), 5.13-5.09 (2H, m, H-3 & H-8), 2.52 (1H, d, *J* = 2.1 Hz, H-1), 2.17-2.11 (2H, m, H-7), 2.08-2.05 (2H, m, H-6), 1.08 (1H, d, *J* = 5.2 Hz, O-H), 1.71 (3H, d, *J* = 1.2 Hz, H-11), 1.63 (3H, s, H-10), 1.60 (3H, s, H-12); **<sup>13</sup>C NMR** (125 MHz, CDCl<sub>3</sub>): δ = 141.1 (C-5), 132.0 (C-9), 124.0 (C-4), 123.6 (C-8), 84.5 (C-2), 72.5 (C-1), 59.0 (C-3), 39.3 (C-6), 26.2 (C-7), 25.7 (C-10), 17.7 (C-12), 16.6 (C-11); ν [cm<sup>-1</sup>] (neat): 3300 (m br, O-H), 3286 (m, C≡C-H), 1666 (w, C=C); **HRMS**: *m/z* (ESI) calcd for C<sub>12</sub>H<sub>19</sub>O [M+H]<sup>+</sup>: 179.1430, found 179.1426; **R<sub>f</sub>** (10% Et<sub>2</sub>O/ pet. ether 40-60) = 0.11

**(E)-((5,9-dimethyldeca-4,8-dien-1-yn-3-yl)oxy)triisopropylsilane (12)**

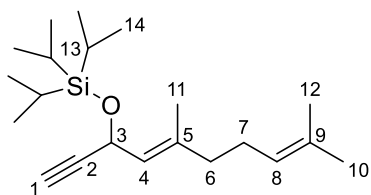

To a solution of **11** (100 mg, 0.53 mmol) and DMAP (129 mg, 1.06 mmol) in CH<sub>2</sub>Cl<sub>2</sub> (3 mL) was added TIPSCl (204 mg, 1.06 mmol), followed by stirring for 90 h. Sat. aq. NaHCO<sub>3</sub> (3 mL) was added, the phases separated, and the aqueous phase extracted with Et<sub>2</sub>O (3 x 2 mL). The combined organic phases were washed with (3 mL), brine (3 mL), dried (Na<sub>2</sub>SO<sub>4</sub>) and concentrated *in vacuo*. The crude product was purified by flash column chromatography (SiO<sub>2</sub>, 5% Et<sub>2</sub>O/ pet. ether 40-60) to give the title compound as a colourless oil (69.2 mg, 0.31 mmol, 58%)

**<sup>1</sup>H NMR** (500 MHz, CDCl<sub>3</sub>):  $\delta$  = 5.39-5.36 (1H, m, H-4), 5.15 (1H, dd,  $J$  = 7.9, 2.1 Hz, H-3), 5.13-5.09 (1H, m, H-8), 2.45 (1H, d,  $J$  = 2.4 Hz, H-1), 2.16-2.10 (2H, m, H-7), 2.07-2.03 (3H, m, H-6), 1.70-1.69 (6H, m, H-10 & H-11), 1.62 (3H, s, H-12), 1.16-1.07 (21H, m, H-13 & H-14); **<sup>13</sup>C NMR** (125 MHz, CDCl<sub>3</sub>):  $\delta$  = 136.7 (C-5), 131.7 (C-9), 126.1 (C-4), 123.8 (C-8), 85.1 (C-2), 71.4 (C-1), 60.0 (C-3), 39.1 (C-6), 26.1 (C-7), 25.7 (C-10), 17.9 (C-12 or C-14), 17.8 (C-12 or C-14), 16.6 (C-11), 12.2 (C-13);  $\nu$  [cm<sup>-1</sup>] (neat): 3311 (w, C≡C-H), 2361 (w, C≡C); **HRMS**:  $m/z$  (ASAP) calcd for C<sub>21</sub>H<sub>39</sub>OSi [M+H]<sup>+</sup>: 335.2770, found 335.2766; **R<sub>f</sub>** (10 % Et<sub>2</sub>O/ pet. ether 40-60) = 0.87

**(E)-3-(methoxymethoxy)-5,9-dimethyldeca-4,8-dien-1-yne (13)**

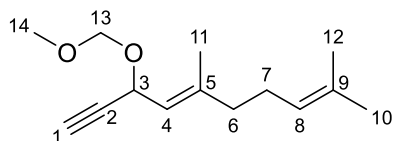

To a solution of **11** (1.00 g, 5.61 mmol) and DIPEA (2.9 mL, 16.8 mmol) in CH<sub>2</sub>Cl<sub>2</sub> (30 mL) was added MOMCl (0.85 mL, 11.22 mmol), followed by stirring at RT for 48 h. Sat. aq. NaHCO<sub>3</sub> (10 mL) was added. The aqueous phase was extracted with Et<sub>2</sub>O (3 x 20 mL), then the combined organic phases were washed with brine (30 mL), dried (Na<sub>2</sub>SO<sub>4</sub>) then concentrated *in vacuo*. The crude product was purified by flash column chromatography (4% Et<sub>2</sub>O/ pet. ether 40-60) to give the title compound as a colourless oil (1.07 g, 4.81 mmol, 86%)

**<sup>1</sup>H NMR** (500 MHz, CDCl<sub>3</sub>):  $\delta$  = 5.34-5.31 (1H, m, H-4), 5.11-5.07 (2H, m, H-3 & H-8), 4.85 (1H, d,  $J$  = 7.0 Hz, H-13<sup>a</sup>), 4.63 (1H, d,  $J$  = 6.7 Hz, H-13<sup>b</sup>), 3.41 (3H, s, H-14), 2.47 (1H, d,  $J$  = 2.1 Hz, H-1), 2.17- 2.11 (2H, m, H-6), 2.09-2.05 (2H, m H-7), 1.74 (3H, d,  $J$  = 1.2 Hz, H-11), 1.69 (3H, s, H-10), 1.61 (3H, s, H-12); **<sup>13</sup>C NMR** (125 MHz, CDCl<sub>3</sub>):  $\delta$  = 141.8 (C-5), 131.9 (C-9), 123.6 (C-8), 121.5 (C-4), 93.1 (C-12), 82.2 (C-2), 73.1 (C-1). 61.5 (C-3), 55.6 (C-14), 39.3 (C-6), 26.2 (C-7), 25.7 (C-10), 17.7 (C-12), 16.6 (C-11);  $\nu$  [cm<sup>-1</sup>] (neat): 3285 (w, C=C-H), 2352 (w, C≡C); HRMS could not be obtained; **R<sub>f</sub>** (10 % Et<sub>2</sub>O/ pet. ether 40-60) = 0.50

**(E)-1-(2-bromophenyl)-4-(methoxymethoxy)-6,10-dimethylundeca-5,9-dien-2-yn-1-one (14)**

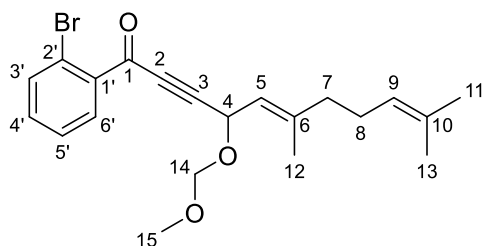

A mixture of 2-bromobenzyl chloride (0.15 mL, 1.11 mmol), PdCl<sub>2</sub>(PPh<sub>3</sub>)<sub>2</sub> (16 mg, 0.92 mmol) and Et<sub>3</sub>N (0.15 mL, 1.11 mmol) and THF (6 mL) was stirred at RT for 10 m. CuI (7 mg, 0.033 mmol) was

added, followed by a further 10 mL of stirring at RT. **13** (0.21 mL, 0.92 mmol) was added, followed by stirring for 1 h 45 m. The mixture was then diluted with EtOAc (15 mL), washed with sat. aq. NH<sub>4</sub>Cl (10 mL), dried (Na<sub>2</sub>SO<sub>4</sub>) and concentrated *in vacuo*. The crude product was purified by flash column chromatography (SiO<sub>2</sub>, 40-60% CH<sub>2</sub>Cl<sub>2</sub>/ pet. ether 40-60) to give the title compound as an orange oil (233 mg, 0.57 mmol, 62%).

**<sup>1</sup>H NMR** (500 MHz, CDCl<sub>3</sub>): δ = 8.03 (1H, dd, *J* = 7.6, 1.8 Hz, H-6'), 7.70 (1H, dd, *J* = 7.9, 1.2 Hz, H-3'), 7.45 (1H, td, *J* = 7.6, 1.2 Hz, H-5'), 7.39 Hz (1H, td, *J* = 7.6, 1.8 Hz, H-4'), 5.39-5.36 (1H, m, H-5) 5.32 (1H, d, *J* = 8.9 Hz, H-4), 5.12-5.08 (1H, m, H-9), 4.87 (1H, d, *J* = 7.0 Hz, H-14<sup>a</sup>), 4.69 (1H, d, *J* = 6.7 Hz, H-14<sup>a</sup>), 3.43 (3H, s, H-15), 2.18-2.09 (4H, m, H-7 & H-8), 1.79 (3H, s, H-12), 1.69 (3H, s, H-11), 1.62 (3H, s, H-13); **<sup>13</sup>C NMR** (125 MHz, CDCl<sub>3</sub>): δ = 176.9 (C-1), 143.3 (C-5), 136.9 (C-11), 135.0 (C-3'), 133.4 (C-4'), 133.1 (C-6'), 132.1 (C-10), 127.3 (C-5'), 123.4 (C-9), 121.2 (C-2'), 119.7 (C-5), 93.6 (C-16), 93.2 (C-3), 83.4 (C-2), 61.9 (C-4), 55.8 (C-15), 39.4 (C-7), 26.1 (C-8), 25.7 (C-11), 17.7 (C-13), 16.8 (C-12); ν [cm<sup>-1</sup>] (neat): 2206 (C≡C), 1655 (s, C=O ketone), 1586 (w, C=C Ar), 1563 (w, C=C Ar); **HRMS**: *m/z* (ASAP) calcd for C<sub>21</sub>H<sub>26</sub>O<sub>3</sub>Br [M+H]<sup>+</sup>: 405.1065, found 405.1054; **R<sub>f</sub>** (40 % CH<sub>2</sub>Cl<sub>2</sub>/ pet. ether 40-60) = 0.14

**(2Z,5E)-1-(2-bromophenyl)-4-(methoxymethoxy)-6,10-dimethyl-3-(methylamino)undeca-2,5,9-trien-1-one (15)**

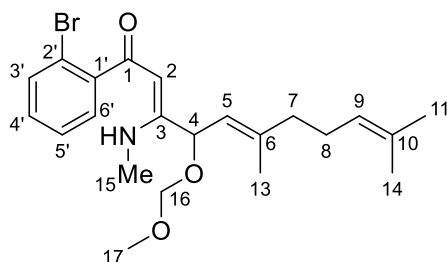

To a solution **14** (233 mg, 0.57 mmol) in MeOH (1.8 mL) was added MeNH<sub>2</sub> (2.0 M in MeOH, 0.57 mL, 1.15 mmol). The reaction vessel was sealed, followed by heating and stirring at 50 °C for 3 h. The solution was cooled and concentrated *in vacuo* to give the title compound as an orange oil (248 mg, 0.57 mmol, 100%).

**<sup>1</sup>H NMR** (500 MHz, CDCl<sub>3</sub>): δ = 11.05 (1H, d, *J* = 4.8 Hz, N-H), 7.57 (1H, dd, *J* = 7.9, 0.9 Hz, H-6'), 7.44 (1H, dd, *J* = 7.6, 1.5 Hz, H-3'), 7.31 (1H, td, *J* = 7.5, 1.2 Hz, H-4'), 7.20-7.17 (1H, m, H-5'), 5.65 (1H, s, H-2), 5.24-5.21 (1H, m, H-5), 5.10 (1H, d, *J* = 9.16 Hz, H-5), 5.08-5.05 (1H, m, H-9), 4.65 (3H, s, H-16), 3.40 (3H, s, H-17), 3.03 (3H, d, *J* = 5.5 Hz, H-15), 2.17-2.11 (4H, m, H-7 & H-8), 1.82 (3H, d, *J* = 1.5 Hz, H-13), 1.68 (3H, s, H-11), 1.61 (3H, s, H-14); **<sup>13</sup>C NMR** (125 MHz, CDCl<sub>3</sub>): δ = 190.8 (C-1), 167.7 (C-3), 143.9 (C-6), 143.5 (C-1'), 133.2 (C-6'), 132.1 (C-10), 129.9 (C-5'), 129.1 (C-3'), 127.1 (C-4'), 123.4 (C-9), 120.4 (C-5), 119.5 (C-2'), 93.5 (C-16), 92.7 (C-2), 69.2 (C-4), 55.8 (C-17), 39.6 (C-7), 29.8 (C-15), 26.2 (C-8), 25.7 (C-11), 17.7 (C-14), 16.8 (C-13); ν [cm<sup>-1</sup>] (neat): 2910 (m, N-

H), 1605 (s, C=O ketone), 1570 (s, C=C Ar); **HRMS**:  $m/z$  (ES) calcd for  $C_{22}H_{31}NO_3$   $[M+H]^+$ : 436.1487, found 436.1491; **R<sub>f</sub>** (50% EtOAc/ pet. ether 40-60) = 0.52

**(E)-2-(1-(methoxymethoxy)-3,7-dimethylocta-2,6-dien-1-yl)-1-methylquinolin-4(1H)-one (16)**

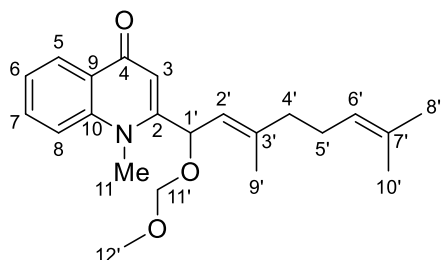

Using the conditions of Wolfe et al.<sup>[2]</sup> A mixture of **15** (100 mg, 0.23 mmol),  $CS_2CO_3$  (150 mg, 0.45 mmol),  $Pd_2dba_3$  (10 mg, 0.01 mmol),  $P(2\text{-furyl})_3$  (10 mg, 0.045 mmol) and toluene (2.5 mL) was heated and stirred in a sealed tube at 100 °C for 24 h. The mixture was filtered through celite, rinsing with EtOAc (10 mL), and concentrated *in vacuo*. The crude product was purified using flash column chromatography ( $SiO_2$ , 60-70% EtOAc/ pet. ether 40-60) to give the title compound as a brown oil (80 mg, 0.23 mmol, 100%).

**<sup>1</sup>H NMR** (400 MHz,  $CDCl_3$ ):  $\delta$  = 8.48 (1H, dd,  $J$  = 8.2, 1.7 Hz, H-5), 7.71 (1H, ddd,  $J$  = 8.5, 7.2, 1.7 Hz, H-7), 7.55 (1H, d,  $J$  = 8.5 Hz, H-8), 7.41 (1H, br t,  $J$  = 7.5 Hz), 6.57 (1H, s, H-3), 5.46 (1H, d,  $J$  = 8.5 Hz, H-1'), 5.37 (1H, br d,  $J$  = 8.9 Hz, H-2'), 5.07-5.02 (1H, m, H-6'), 4.75 (1H, d,  $J$  = 6.8 Hz, H-11<sup>a</sup>), 4.68 (1H, d,  $J$  = 6.8 Hz, H-11<sup>a</sup>), 3.81 (3H, s, H-11), 3.43 (3H, s, H-12'), 2.16-2.12 (4H, m, H-4' & H-5'), 1.83 (3H, s, H-9'), 1.67-1.65 (6H, m, H-8' & H-10'); **<sup>13</sup>C NMR** (100 MHz,  $CDCl_3$ ):  $\delta$  = 178.4 (C-4), 152.9 (C-2), 143.8 (C-3'), 142.4 (C-10), 132.3 (C-7 or C-7'), 132.2 (C-7 or C-7'), 126.7 (C-5), 126.6 (C-9), 123.5 (C-6 or C-6'), 123.4 (C-6 or C-6'), 121.3 (C-2'), 115.4 (C-8), 110.6 (C-3), 93.8 (C-11'), 72.2 (C-1'), 56.0 (C-12'), 39.7 (C-6'), 34.9 (C-11), 26.1 (C-5'), 25.7 (C-8'), 17.7 (C-10'), 16.9 (C-9');  $\nu$  [ $cm^{-1}$ ] (neat): 1622 (s, C=O quinolone), 1600 (s, C=C Ar); **HRMS**:  $m/z$  (ES) calcd for  $C_{22}H_{30}NO_3$   $[M+H]^+$ : 356.2226, found 356.2240; **R<sub>f</sub>** (70% EtOAc/ pet. ether 40-60) = 0.25

**(E)-2-(1-hydroxy-3,7-dimethylocta-2,6-dien-1-yl)-1-methylquinolin-4(1H)-one (5) & (E)-2-(3-hydroxy-3,7-dimethylocta-1,6-dien-1-yl)-1-methylquinolin-4(1H)-one (6)**

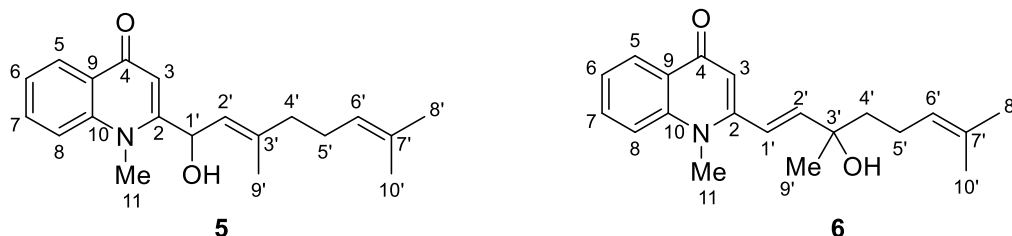

A mixture of **16** (62 mg, 0.17 mmol) and pyridinium tosylate (437 mg, 1.74 mmol) in *t*-BuOH (3 mL) was stirred at reflux for 48 h. Following cooling, the mixture was diluted with sat. aq.  $NaHCO_3$  (3 mL)

and extracted with EtOAc (3 x 2 mL). The combined organic phases were dried (MgSO<sub>4</sub>) and concentrated *in vacuo*. Purification by flash column chromatography (SiO<sub>2</sub>, 40-100% EtOAc/ Pet. ether 40-60) gave **5** and **6** as 4:1 mixture respectively (based on <sup>1</sup>H NMR analysis) (39 mg, 0.13 mmol, 72%). The products were separated by semi-preparative HPLC (5-95% B) to provide **5** and **6** as off-white semi-solids.

*(E)*-2-(1-hydroxy-3,7-dimethylocta-2,6-dien-1-yl)-1-methylquinolin-4(1H)-one (**5**):

<sup>1</sup>H NMR (500 MHz, CDCl<sub>3</sub>): δ = 8.27 (1H, dd, *J* = 7.9, 1.5 Hz, H-5), 7.50 (1H, ddd, *J* = 8.9, 7.0, 1.8 Hz, H-7) 7.33 (1H, ddd, *J* = 7.6, 7.0, 0.6 Hz, H-6), 7.19 (1H, d, *J* = 8.6 Hz, H-8), 6.45 (1H, s, H-3), 5.48-5.42 (2H, m, H-1' & H-2'), 5.06-5.02 (1H, m, H-6'), 3.70 (3H, s, H-11), 2.12-2.05 (4H, m, H-4' & H-5'), 1.72 (3H, d, *J* = 0.9 Hz, H-9'), 1.65 (3H, s, H-8'), 1.56 (3H, s, H-10'); <sup>13</sup>C NMR (125 MHz, CDCl<sub>3</sub>): δ = 178.2 (C-4), 156.0 (C-2), 141.9 (C-10 or C-3'), 141.8 (C-3' or C-10'), 132.1 (C-7), 132.0 (C-7'), 126.0 (C-5), 125.5 (C-9), 123.6 (C-6'), 123.3 (C-2'), 123.2 (C-6), 115.3 (C-8), 110.7 (C-3), 69.8 (C-1'), 39.6 (C-4'), 35.0 (C-11), 26.2 (C-5'), 25.7 (C-8'), 17.7 (C-10'), 17.0 (C-9'); ν [cm<sup>-1</sup>] (neat): 3240 (br, O-H), 1618 (m, C=O quinolone), 1597 (s, C=C Ar), 1556 (m, C=C Ar), 1499 (m, C=C Ar), 1467 (m, C=C Ar), 1443 (m, C=C Ar); HPLC *t<sub>r</sub>* = 11.04 mins (5-95% B); analytical data consistent with that previously published (slight changes in the NMR data were observed on a sample by sample basis, likely due to minute variations in the amount of water present in the samples. Note that H-8', H-9' and H-10' are reassigned relative to the original isolation paper, on the basis of 2D NMR data).<sup>[3]</sup>

*(E)*-2-(3-hydroxy-3,7-dimethylocta-1,6-dien-1-yl)-1-methylquinolin-4(1H)-one (**6**):

<sup>1</sup>H NMR (400 MHz, CDCl<sub>3</sub>): δ = 8.42 (1H, dd, *J* = 8.0, 1.6 Hz, H-5), 7.64 (1H, ddd, *J* = 8.4, 6.8, 1.6 Hz, H-7), 7.44 (1H, d, *J* = 8.8 Hz, H-8), 7.36 (1H, t, *J* = 7.4 Hz, H-6), 6.72 (1H, d, *J* = 15.6 Hz, H-1'), 6.35 (1H, d, *J* = 14.8 Hz, H-2'), 6.34 (1H, s, H-3), 5.12 (1H, m, H-6'), 3.69 (3H, s, H-11), 2.09 (2H, m, H-5'), 1.70 (2H, m, H-4'), 1.68 (3H, s, H-8'), 1.60 (3H, s, H-10'), 1.39 (3H, s, H-9'); <sup>13</sup>C NMR (125 MHz, CDCl<sub>3</sub>): δ = 177.9 (C-4), 152.3 (C-2), 147.0 (C-13), 141.5 (C-9), 132.5 (C-10), 132.2 (C-7), 126.7 (C-18), 126.6 (C-5), 123.9 (C-17), 123.4 (C-6), 121.6 (C-12), 115.4 (C-8), 109.7 (C-3), 73.4 (C-14), 42.1 (C-15), 35.5 (C-11), 28.3 (C-20), 25.7 (C-21), 22.9 (C-16), 17.8 (C-19); ν [cm<sup>-1</sup>] (neat): 3242 (br, O-H), 1655 (w, C=C), 1618 (C=O), 1596 (s, quinolone ring), 1552 (s, quinolone ring); HPLC *t<sub>r</sub>* = 10.11 mins (5-95% B); analytical data consistent with that previously published.<sup>[3]</sup>

*(E)*-2-(3,7-dimethylocta-2,6-dien-1-yl)-3-methylquinolin-4(1H)-one (**1**)



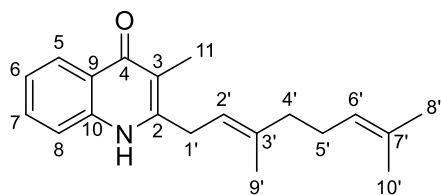

To a solution of 2-(chloromethyl)-3-methylquinolin-4(1*H*)-one (prepared by our previously published procedure)<sup>[4]</sup> (263 mg, 1.27 mmol) and (*E*)-2-(2,6-dimethylhepta-2,-5-dien-1-yl)-4,4,5,5-tetramethyl-1,3,2-dioxaborolane (prepared by our previously published procedure)<sup>[4]</sup> (264 mg, 0.63 mmol) in 1,4-dioxane (5 mL) was added a solution of sodium carbonate (2 M, 5 mL) and Pd(PPh<sub>3</sub>)<sub>4</sub> (139 g, 0.12 mmol). The reaction vessel was sealed followed by heating at 120 °C for 2 h. The mixture was filtered through celite, rinsing with EtOAc. The organic phase was washed with brine (2 x 10 mL), dried over MgSO<sub>4</sub> and concentrated *in vacuo*. The crude material was purified by flash column chromatography (SiO<sub>2</sub>, 50% EtOAc) to obtain the desired compound as an off-white solid (141 mg, 0.48 mmol, 38%)

<sup>1</sup>H NMR (400 MHz, CDCl<sub>3</sub>): δ = 9.82 (1H, br s, N-H), 8.36 (1H, d, *J* = 7.8 Hz, H-5), 7.50 (1H, t, *J* = 7.7 Hz, H-7), 7.40 (1H, d, *J* = 8.2 Hz, H-8), 7.25 (1H, t, *J* = 7.5 Hz, H-6), 5.29 (1H, t, *J* = 7.0 Hz, H-2'), 5.10-5.04 (1H, m, H-6'), 3.50 (2H, d, *J* = 7.2 Hz, H-1'), 2.15 (3H, s, H-10), 2.14-2.08 (4H, m, H-4' & H-5'), 1.67 (6H, s, H-8' & H-9'), 1.59 (3H, s, H-10'); <sup>13</sup>C NMR (100 MHz, CDCl<sub>3</sub>): δ = 177.9 (C-4), 147.7 (C-2), 141.6 (C-10), 138.8 (C-3'), 132.2 (C-7'), 131.0 (C-7), 126.1 (C-5), 123.8 (C-9), 123.6 (C-6'), 123.1 (C-6), 117.4 (C-8), 117.3 (C-2'), 115.5 (C-3), 39.6 (C-4'), 31.2 (C-1'), 26.4 (C-5'), 25.8 (C-8'), 17.8 (C-10'), 16.4 (C-9'), 10.5 (C-11); ν [cm<sup>-1</sup>] (neat): 1637 (m, C=O quinolone), 1607 (w, C=C Ar), 1589 (m, C=C Ar), 1549 (m, C=C Ar), 1492 (s, C=C Ar), 1472 (s, C=C Ar), 1444 (m, C=C Ar), 1357 (s, C=C Ar); mp (EtOAc): 188-189 °C (lit. value: 199-200 °C); analytical data consistent with that previously published (slight changes in the NMR data were observed on a sample by sample basis, likely due to minute variations in the amount of water present in the samples).<sup>[3]</sup>

**(*E*)-2-(3,7-dimethylocta-2,6-dien-1-yl)-1,3-dimethylquinolin-4(1*H*)-one (4)**

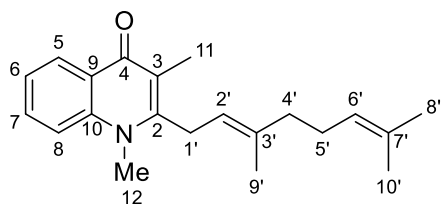

To a suspension of **1** (25 mg, 0.085 mmol) in THF (0.5 mL) was added Li*O**t*-Bu (14 mg, 0.17 mmol), followed by stirring at RT for 20 min. Iodomethane (21 μL, 0.34 mmol) was added at 0 °C followed by stirring at RT for 3 h, at which point LCMS indicated incomplete reaction so a further portion of iodomethane (21 μL, 0.34 mmol) followed by stirring at RT for 12 h. Sat. aq. NaHCO<sub>3</sub> (2 mL) was added, followed by extraction with EtOAc (3 x 2 mL). The combined organic extracts were dried (MgSO<sub>4</sub>) and concentrated *in vacuo*. The crude product was purified using flash column

chromatography (SiO<sub>2</sub>, 40% EtOAc/ pet. ether 40-60) to give the title compound as an off-white semi-solid (16 mg, 0.051 mmol, 60%)

<sup>1</sup>H NMR (500 MHz, CDCl<sub>3</sub>): δ = 8.48 (1H, dd, *J* = 8.2, 1.8 Hz, H-5), 7.61 (1H, ddd, *J* = 8.9 Hz, 7.0, 1.8 Hz, H-7), 7.46 (1H, d, *J* = 8.5 Hz, H-8) 7.33 (1H, ddd, *J* = 7.9, 6.7, 0.6 Hz, H-6), 5.08-5.01 (1H, m, H-2'), 3.72 (3H, s, H-11), 3.56 (1H, dd, *J* = 6.1, 0.9 Hz, H-1'), 2.22 (3H, s, H-12), 2.13-2.04 (4H, m, H-4' & H-5'), 1.78 (3H, d, *J* = 1.2 Hz, H-9'), 1.65 (3H, d, *J* = 0.9 Hz, H-8'), 1.58 (3H, s, 10'); <sup>13</sup>C NMR (125 MHz, CDCl<sub>3</sub>): δ = 177.1 (C-4), 150.6 (C-2), 141.1 (C-10), 139.0 (C-3'), 131.9 (C-7'), 131.5 (C-7), 127.0 (C-5), 124.9 (C-9), 123.5 (C-6'), 122.7 (C-6), 118.3 (C-2'), 117.6 (C-3), 115.0 (C-8), 39.4 (C-4'), 34.8 (C-12), 31.0 (C-1'), 26.5 (C-5'), 25.7 (C-8'), 17.7 (C-10'), 16.5 (C-9'), 11.6 (C-11); ν [cm<sup>-1</sup>] (neat): 1614 (m, C=O quinolone), 1593 (s, C=C Ar), 1540 (s, C=C Ar), 1499 (m, C=C Ar), 1471 (m, C=C Ar), 1436 (m, C=C Ar); analytical data consistent with that previously published.<sup>[3]</sup>

**(E)-2-(5-(3,3-dimethyloxiran-2-yl)-3-methylpent-2-en-1-yl)-1,3-dimethylquinolin-4(1H)-one (8)**

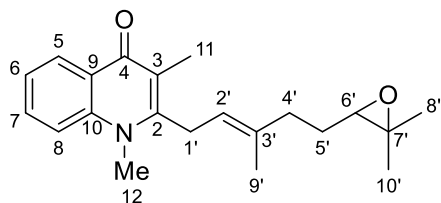

To a solution of **4** (23 mg, 0.074 mmol) in CH<sub>2</sub>Cl<sub>2</sub> (0.5 mL) was added NaHCO<sub>3</sub> (8 mg, 0.096 mmol). The mixture was cooled to 0 °C and *m*-CPBA (77% purity, 18 mg, 0.081 mmol) was added, followed by stirring at RT for 30 min. H<sub>2</sub>O (1 mL) was added and the phases separated. The organic phase was washed with sat. aq. NaHCO<sub>3</sub> (0.5 mL), and then the combined aqueous phases were extracted with EtOAc (2 x 2 mL). The combined organic phases were dried (Na<sub>2</sub>SO<sub>4</sub>) and concentrated *in vacuo*. The crude product was purified using flash column chromatography (SiO<sub>2</sub>, 70-80% EtOAc/ pet. ether 40-60) to give the title compound as a colourless semi-solid (10.3 mg, 0.0316 mmol, 43%).

<sup>1</sup>H NMR (500 MHz, CDCl<sub>3</sub>): δ = 8.48 (1H, dd, *J* = 7.9, 1.5 Hz, H-5), 7.62 (1H, ddd, *J* = 8.9, 7.0, 1.8 Hz, H-7), 7.47 (1H, d, *J* = 8.5 Hz, H-8) 7.33 (1H, ddd, *J* = 7.9, 7.0, 0.9 Hz, H-6), 5.15-5.11 (1H, m, H-2'), 3.73 (3H, s, H-12), 3.59 (2H, d, *J* = 6.1 Hz, H-1'), 2.67 (1H, dd, *J* = 7.0, 5.2 Hz, H-6'), 2.29-2.14 (2H, m, H-4'), 2.22 (3H, s, H-11), 1.82 (3H, d, *J* = 1.2 Hz, H-9'), 1.72-1.60 (2H, m, H-5'), 1.28 (3H, s, H-8'), 1.25 (3H, s, H-10'); <sup>13</sup>C NMR (125 MHz, CDCl<sub>3</sub>): δ = 177.1 (C-4), 150.3 (C-2), 141.1 (C-10), 138.4 (C-3'), 131.5 (C-7), 127.0 (C-5), 124.9 (C-9), 122.8 (C-6), 118.7 (C-2'), 117.4 (C-3), 115.0 (C-8), 63.9 (C-6'), 58.2 (C-7'), 36.4 (C-4'), 35.0 (C-12), 30.6 (C-1'), 27.4 (C-5'), 24.8 (C-8'), 18.8 (C-10'), 16.6 (C-9'), 11.7 (C-11); ν [cm<sup>-1</sup>] (neat): 1614 (m, C=O quinolone), 1597 (s, C=C Ar), 1571 (m, C=C Ar), 1540 (s, C=C Ar), 1500 (m, C=C Ar), 1471 (m, C=C Ar); analytical data consistent with that previously published.<sup>[3]</sup>

**(E)-2-(3,7-dimethylocta-2,6-dien-1-yl)-3-methyl-1-((methylthio)methyl)quinolin-4(1H)-one (7)**

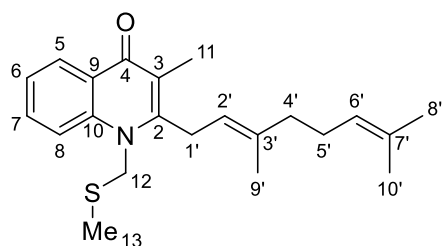

To a suspension of **1** (52 mg, 0.18 mmol) in THF (0.5 mL) was added LiOt-Bu (1M solution in THF, 0.2 mL, 0.2 mmol). The resulting solution was stirred for 20 m at RT, followed by addition of chloromethyl methyl sulfide (55  $\mu$ L, 3.7 mmol) at 0 °C. The mixture was warmed to RT, followed by stirring for 12 h. Water (2 mL) was added, followed by extraction with EtOAc (3 x 1 mL). The combined organic phases were dried ( $\text{Na}_2\text{SO}_4$ ) and concentrated *in vacuo*. The crude mixture was separated using flash column chromatography ( $\text{SiO}_2$ , 30-50 % EtOAc/ Pet. ether 40-60) to give recovered starting material (20 mg, 0.068 mmol, 37%) and the title compound as a yellow semi-solid (3.8 mg, 0.11 mmol, 6%).

$^1\text{H NMR}$  (500 MHz,  $\text{CDCl}_3$ ):  $\delta$  = 8.47 (1H, dd,  $J$  = 7.9, 1.5 Hz, H-5), 7.67-7.60 (2H, m, H-7 & H-8), 7.35 (1H, ddd,  $J$  = 7.9, 6.4, 1.5 Hz, H-6), 5.14 (2H, s, H-12), 5.12-5.07 (1H, m, H-2'), 5.07-5.02 (1H, m, H-6'), 3.70 (2H, d,  $J$  = 6.1 Hz, H-1'), 2.22 (6H, m, H-11 & H-13), 2.14-2.07 (4H, m, H-4' & H-5'), 1.83 (3H, d,  $J$  = 0.9 Hz, H-8'), 1.67 (3H, s, H-10'), 1.60 (3H, s, H-9' [overlaps with water peak]);  $^{13}\text{C NMR}$  (125 MHz,  $\text{CDCl}_3$ ):  $\delta$  = 177.4 (C-4), 149.9 (C-2), 140.3 (C-10), 139.5 (C-3'), 131.9 (C-7'), 131.6 (C-7), 127.2 (C-5), 124.9 (C-9), 123.6 (C-6), 123.2 (C-6'), 118.6 (C-2'), 118.2 (C-3), 115.6 (C-8), 49.6 (C-12), 39.4 (C-4'), 30.1 (C-1'), 26.3 (C-5'), 25.7 (C-8'), 17.7 (C-10'), 16.5 (C-9'), 14.5 (C-13), 11.5 (C-11);  $\nu$  [ $\text{cm}^{-1}$ ] (neat): 1615 (m, C=O quinolone), 1597 (s, C=C Ar), 1545 (m, C=C Ar), 1491 (m, C=C Ar); analytical data consistent with that previously published.<sup>[3]</sup>

## References

- [1] M. Lautens, M. L. Maddess, *Org. Lett.* **2004**, *6*, 1883–6.
- [2] J. P. Wolfe, R. A. Rennels, S. L. Buchwald, *Tetrahedron* **1996**, *52*, 7525–7546.
- [3] K. A. Dekker, T. Inagaki, T. D. Gootz, L. H. Huang, Y. Kojima, W. E. Kohlbrenner, Y. Matsunaga, P. R. McGuirk, E. Nomura, T. Sakakibara, et al., *J. Antibiot. (Tokyo)*. **1998**, *51*, 145–152.
- [4] F. Salvaggio, J. T. Hodgkinson, L. Carro, S. M. Geddis, W. R. J. D. Galloway, M. Welch, D. R. Spring, *European J. Org. Chem.* **2016**, *2016*, 434–437.

# $^1\text{H}$ and $^{13}\text{C}$ spectra

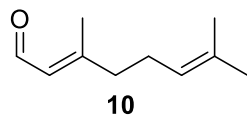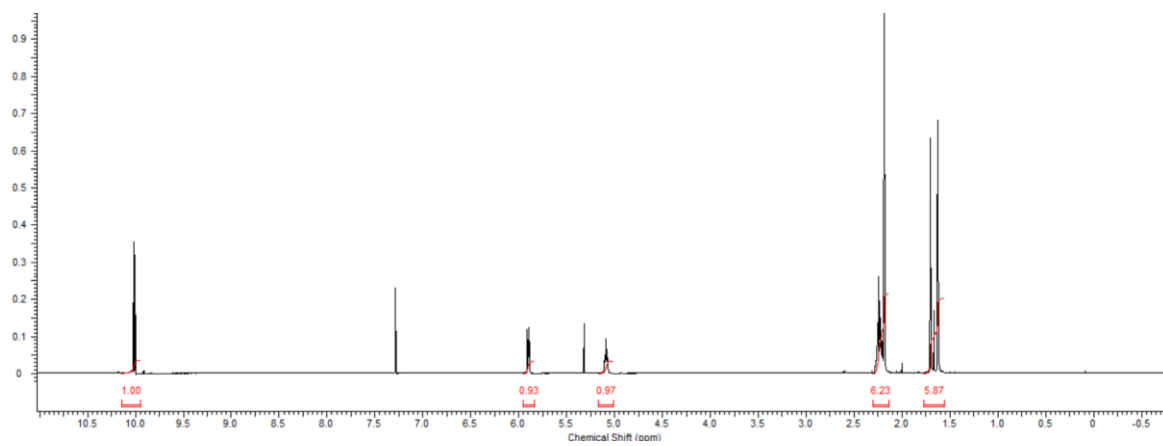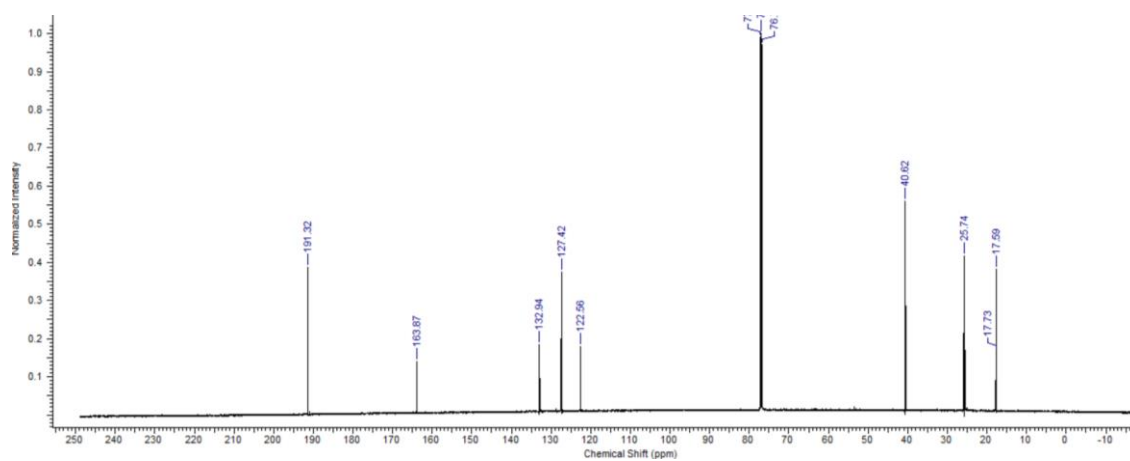

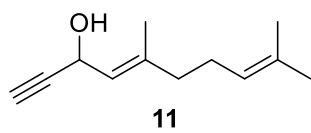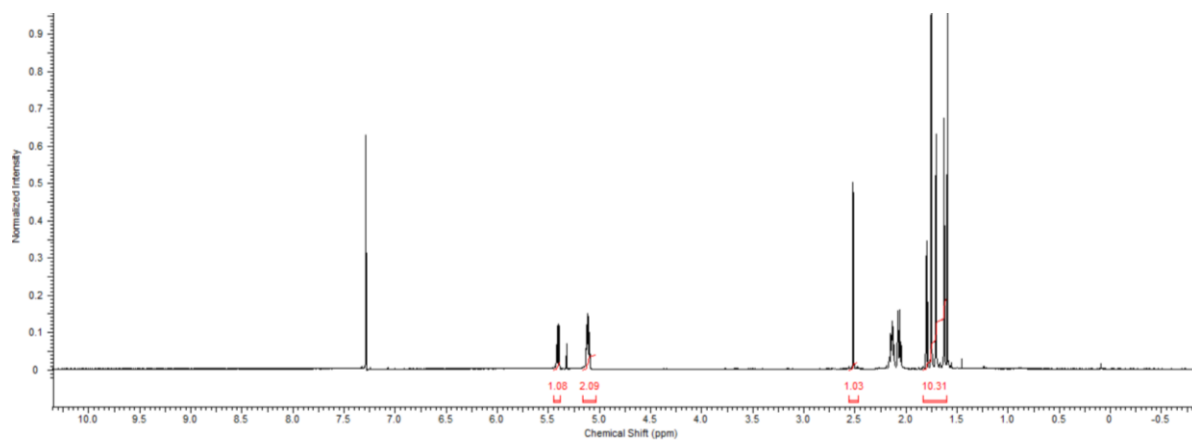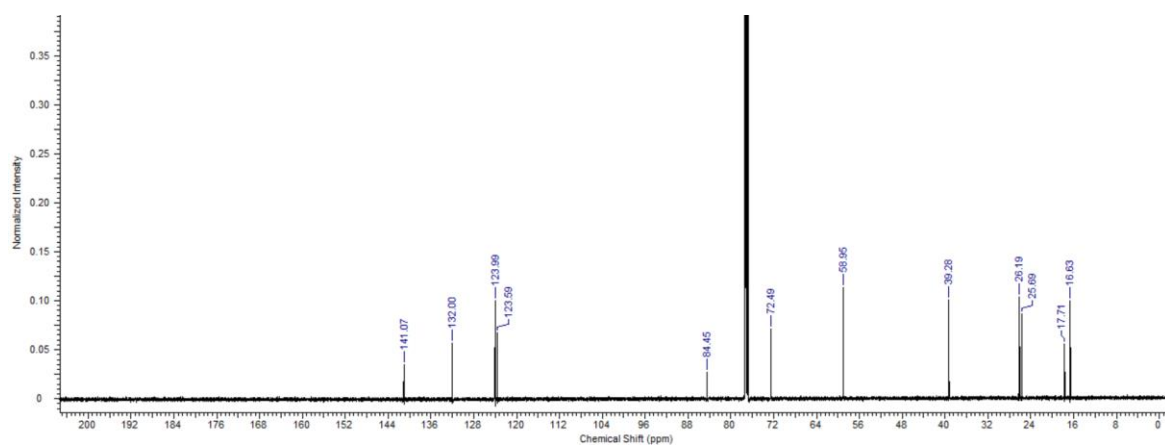

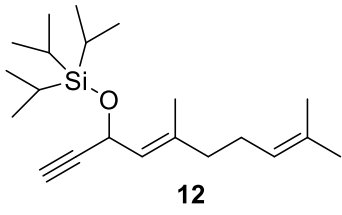

12

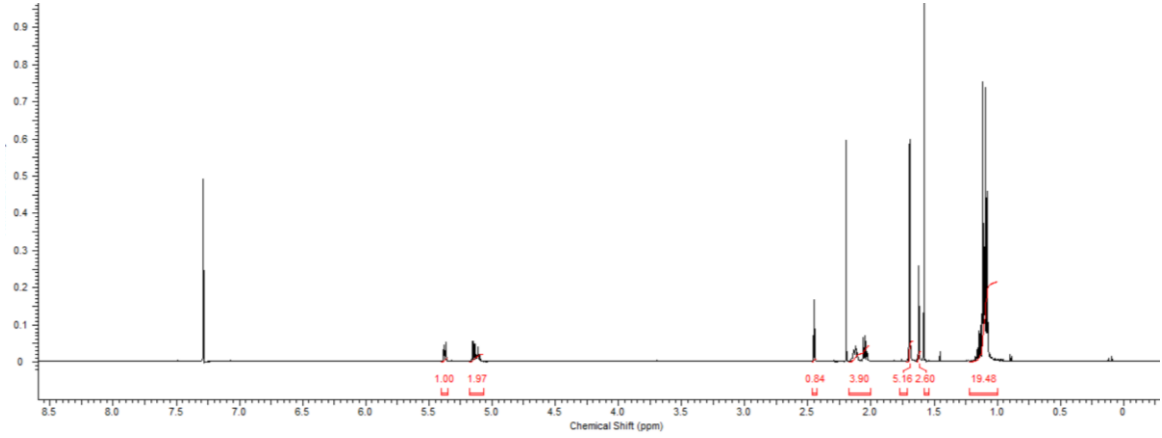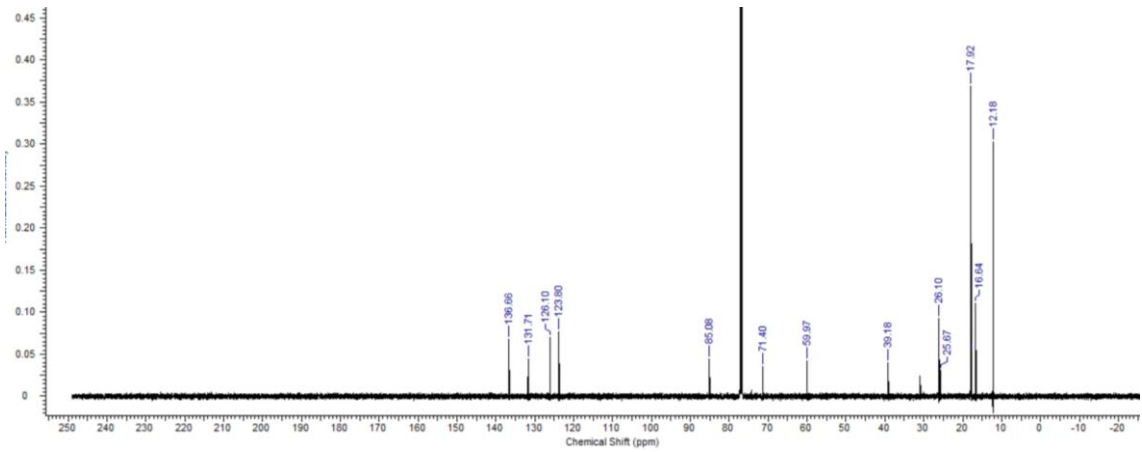

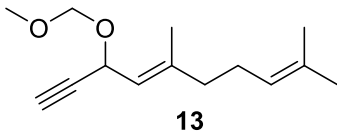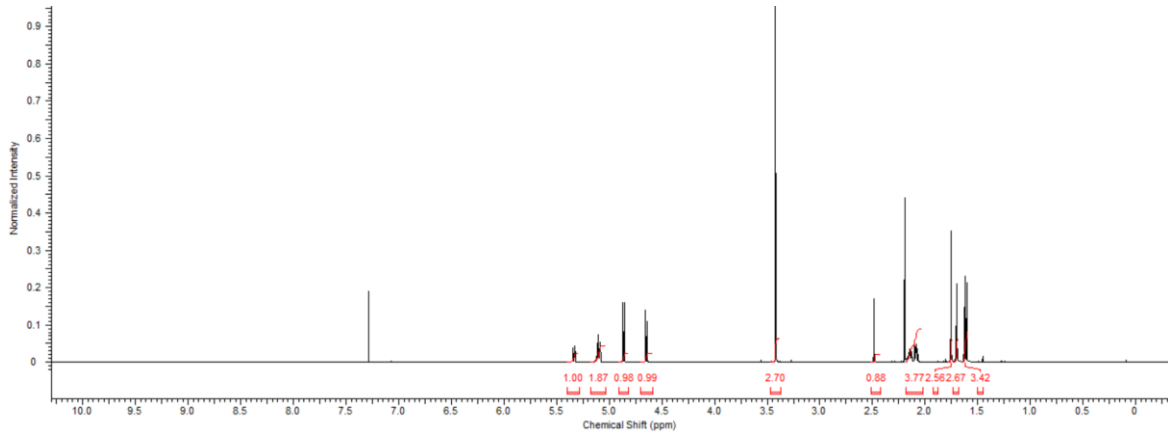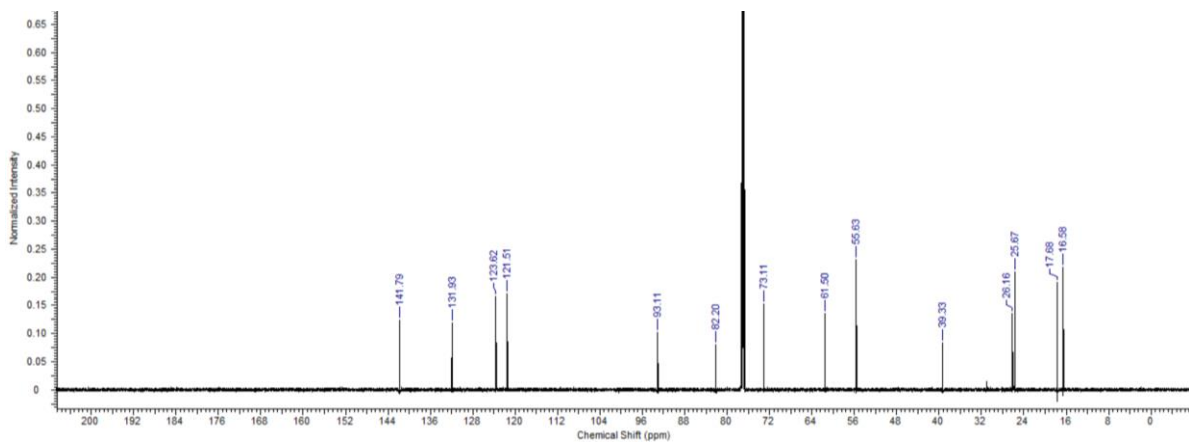

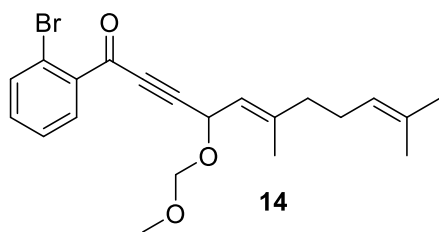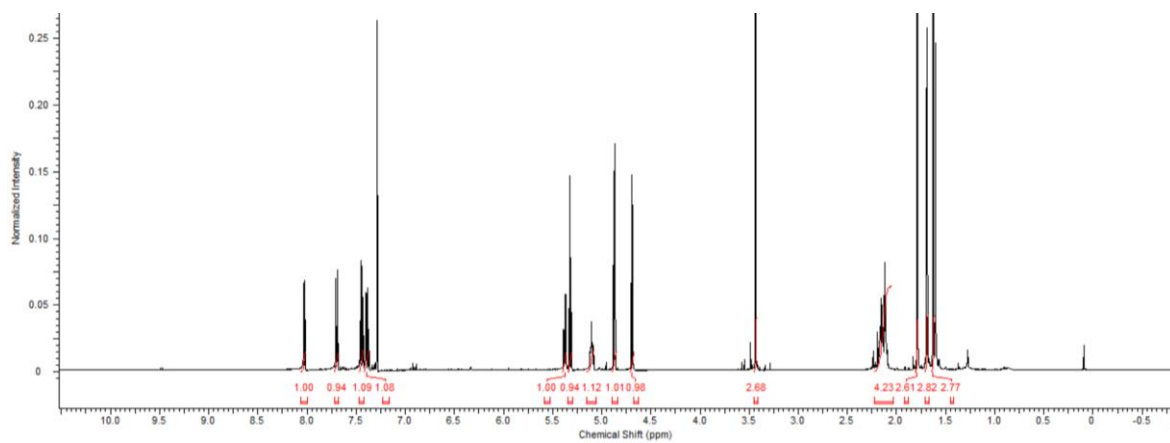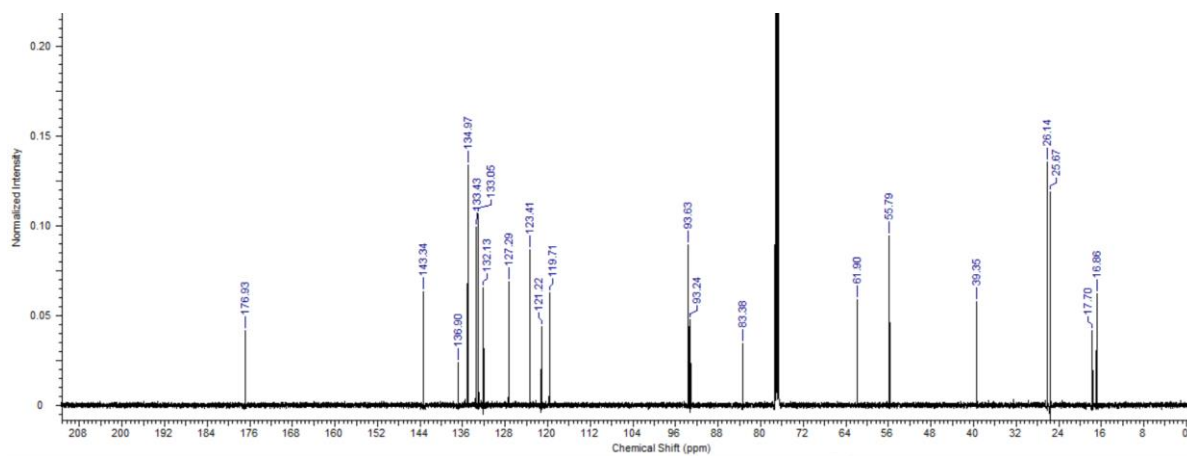



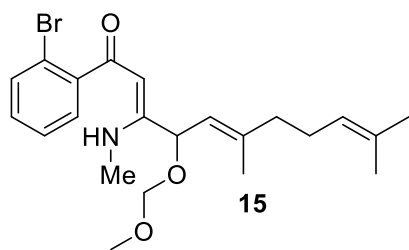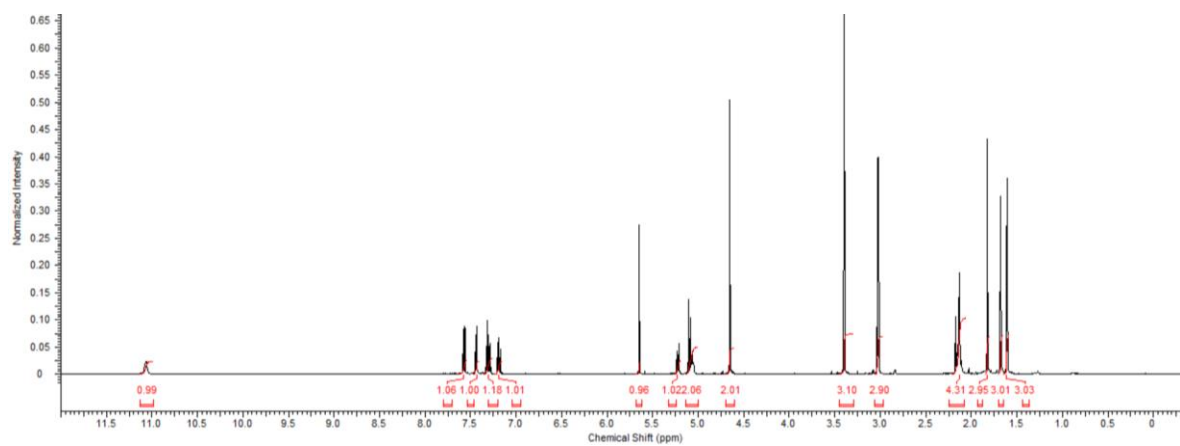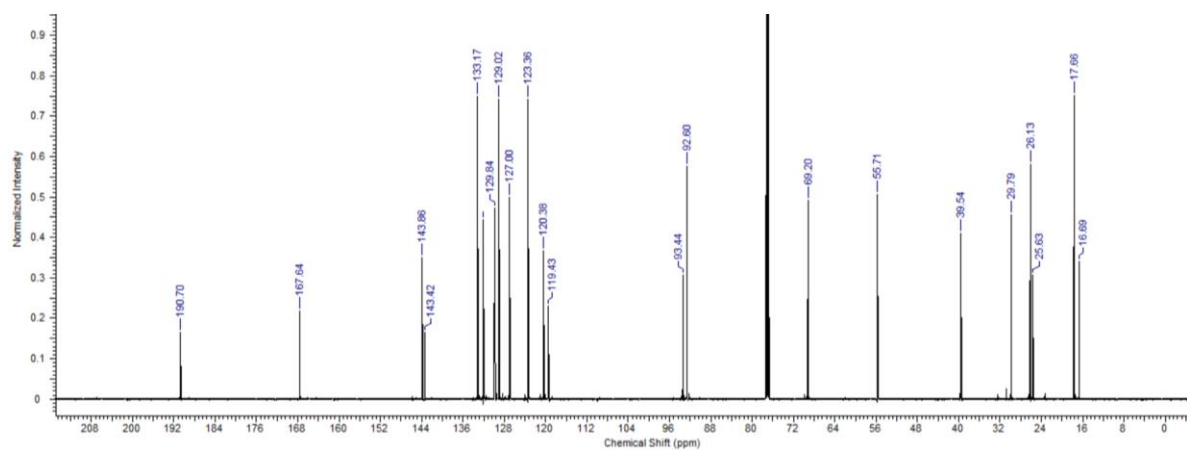

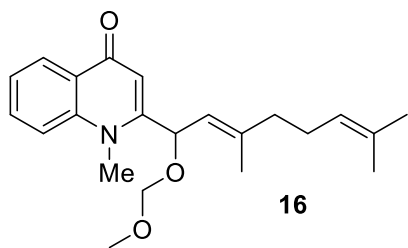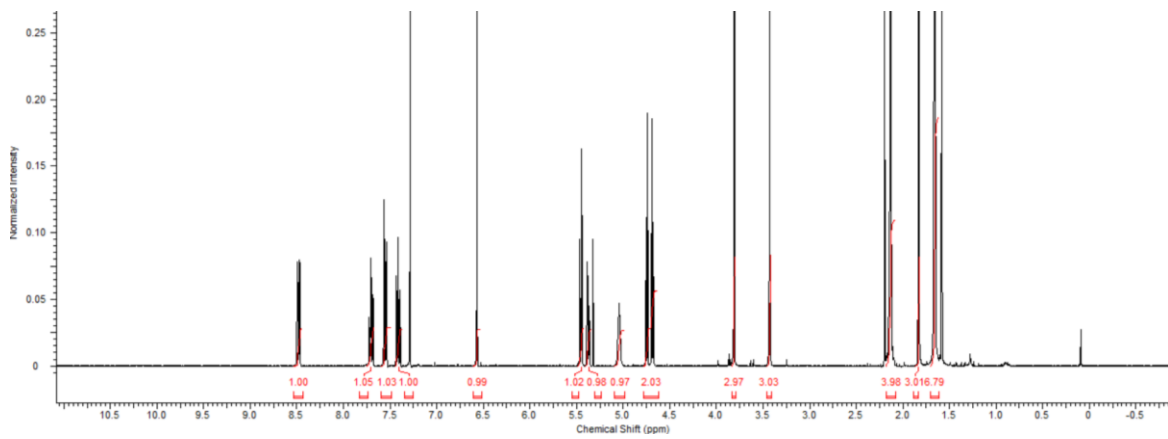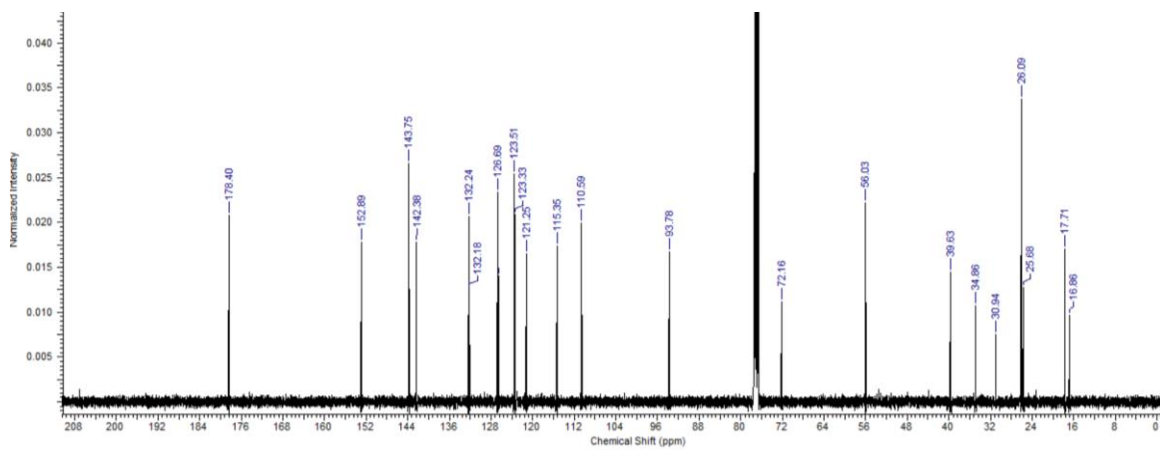

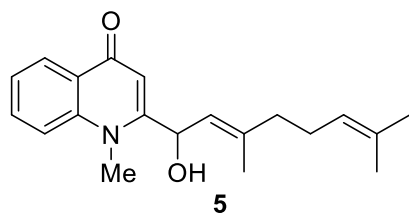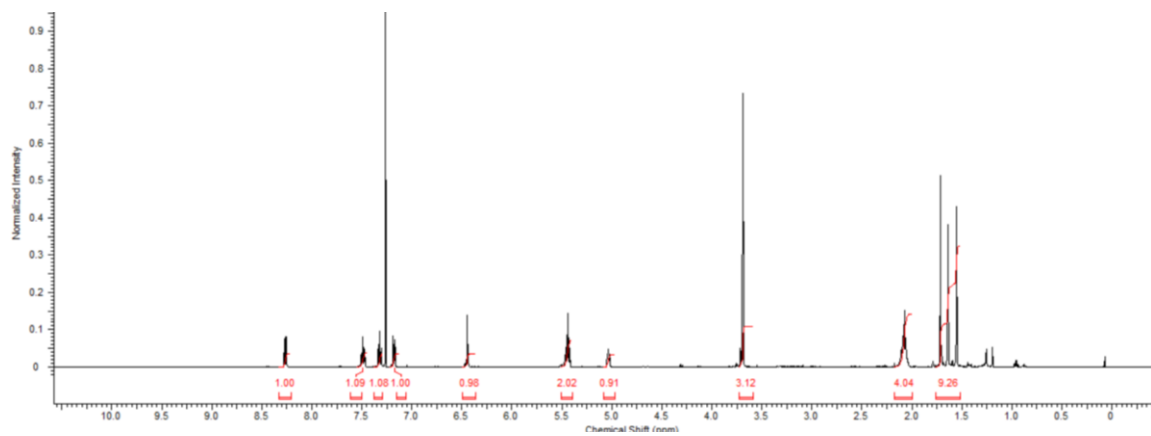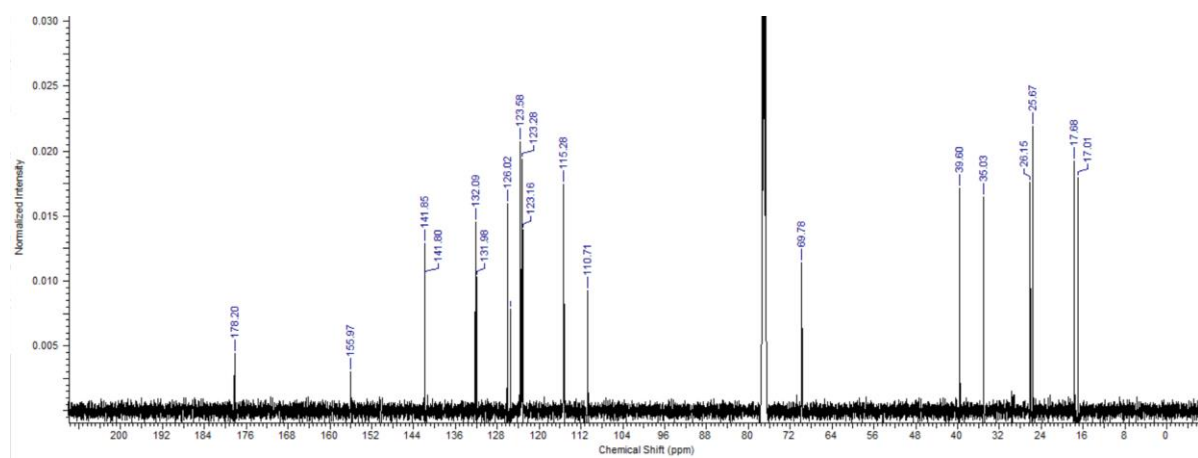

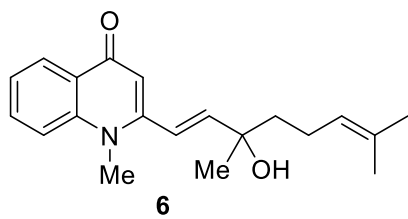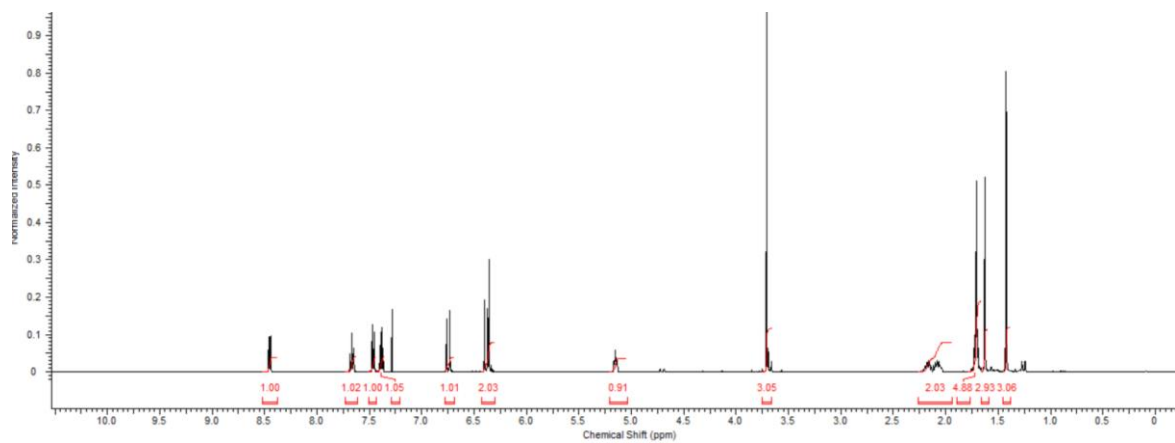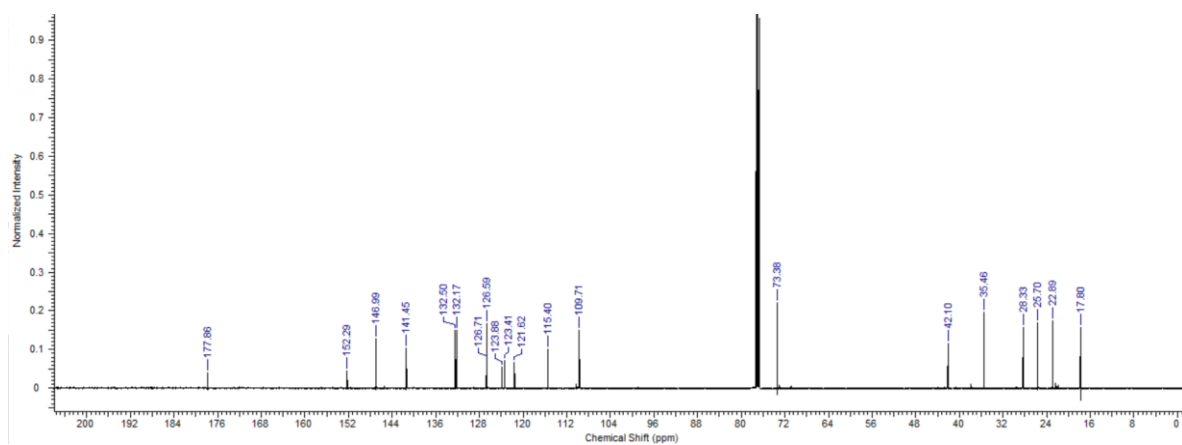

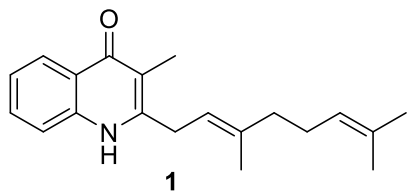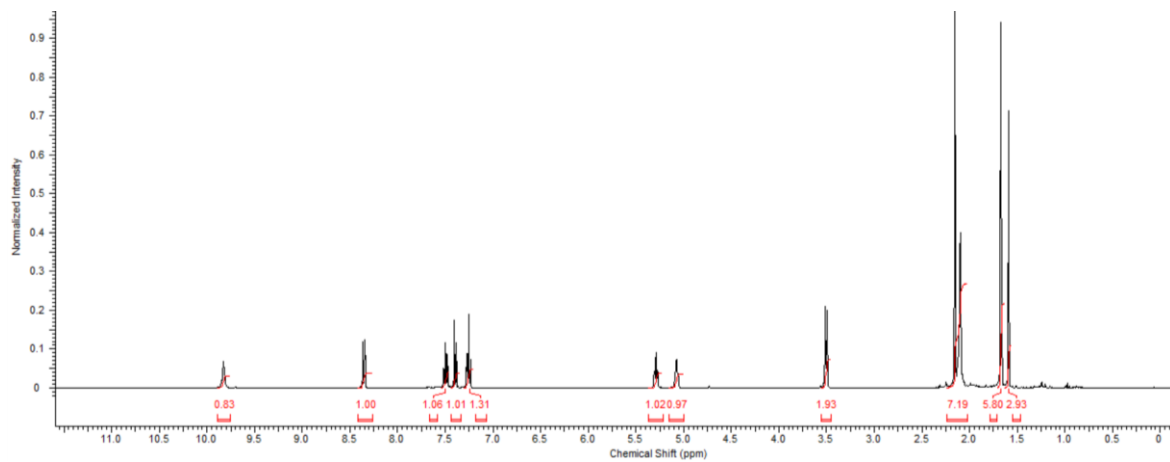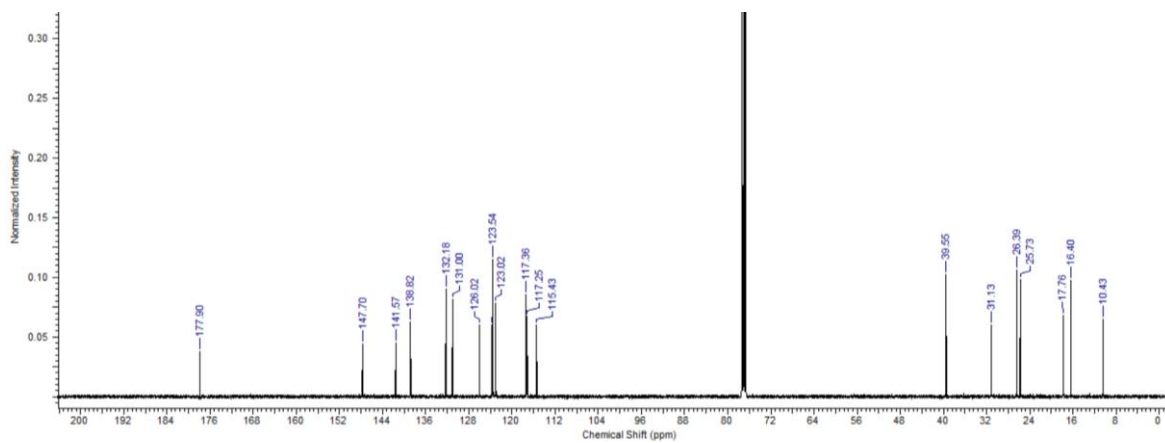

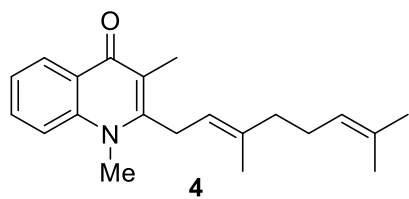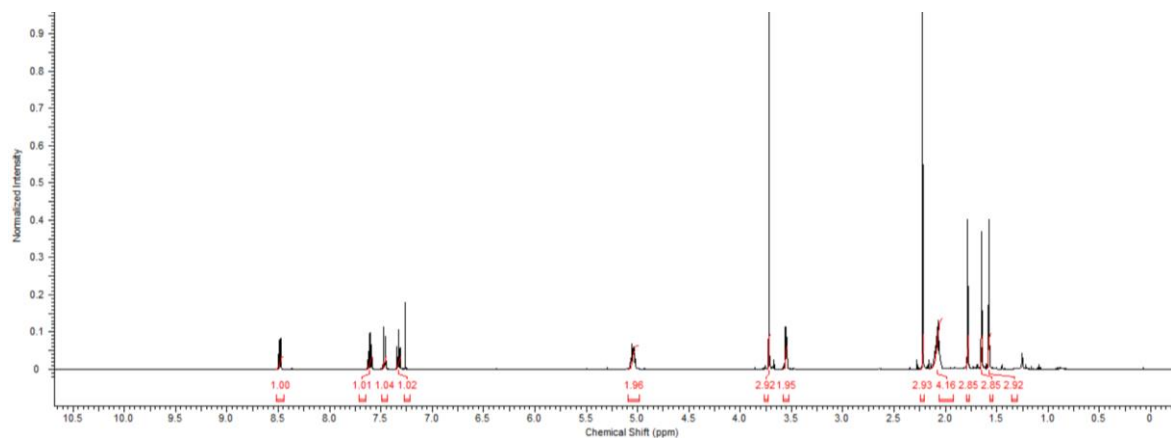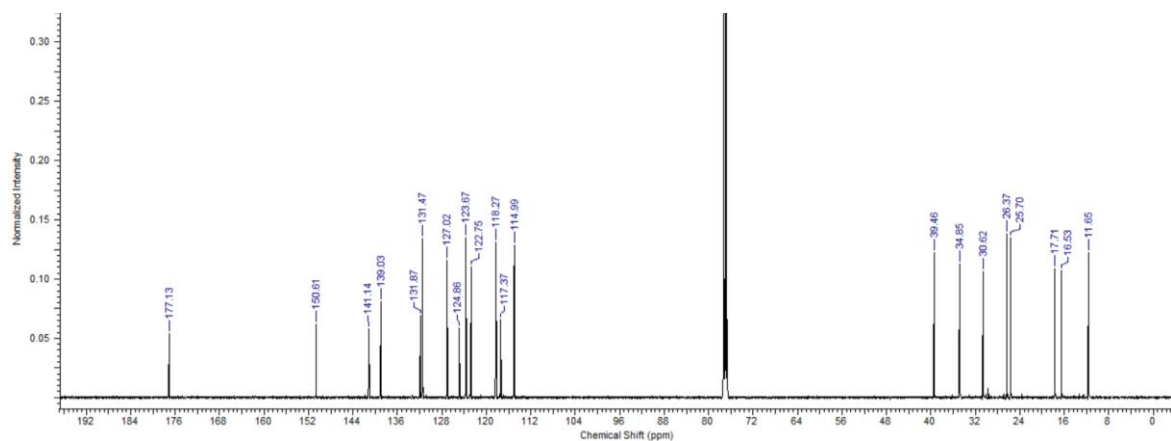

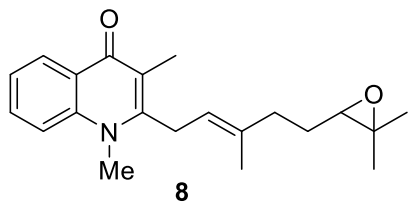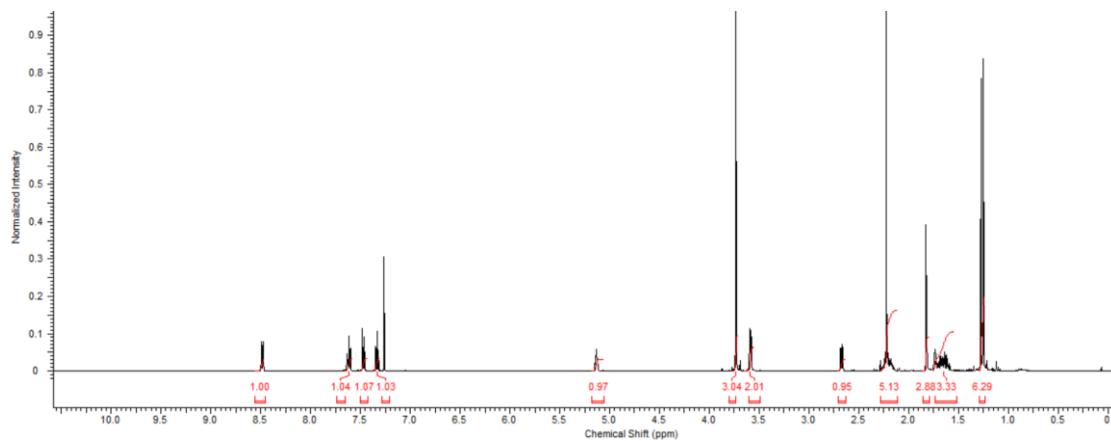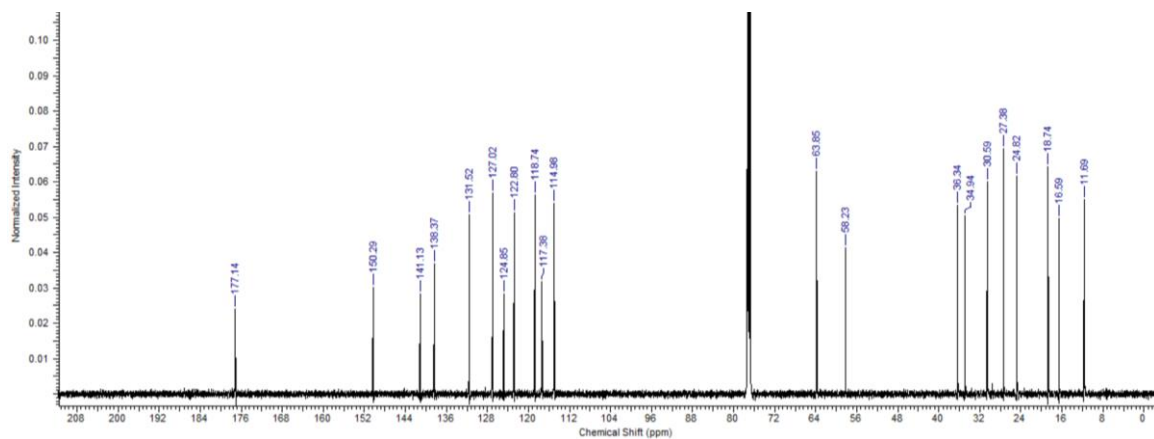

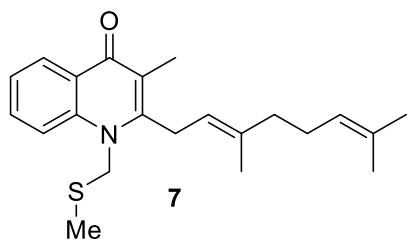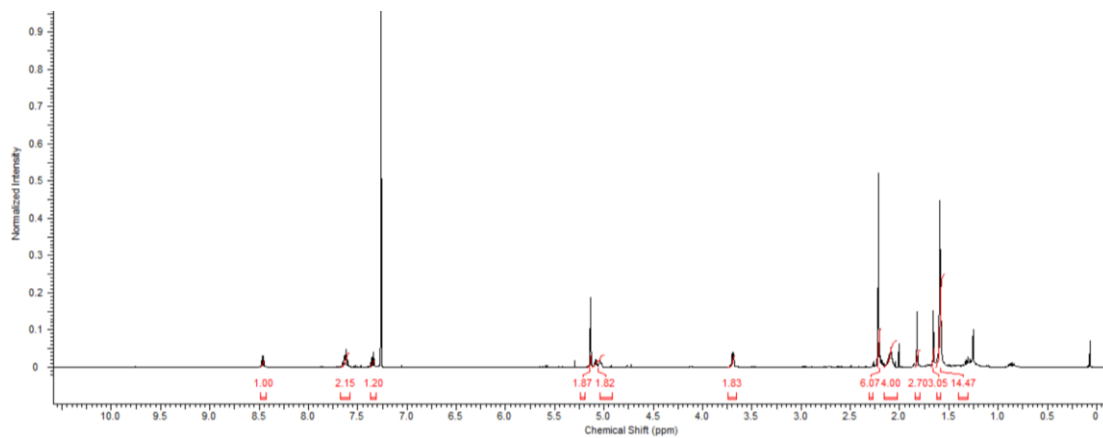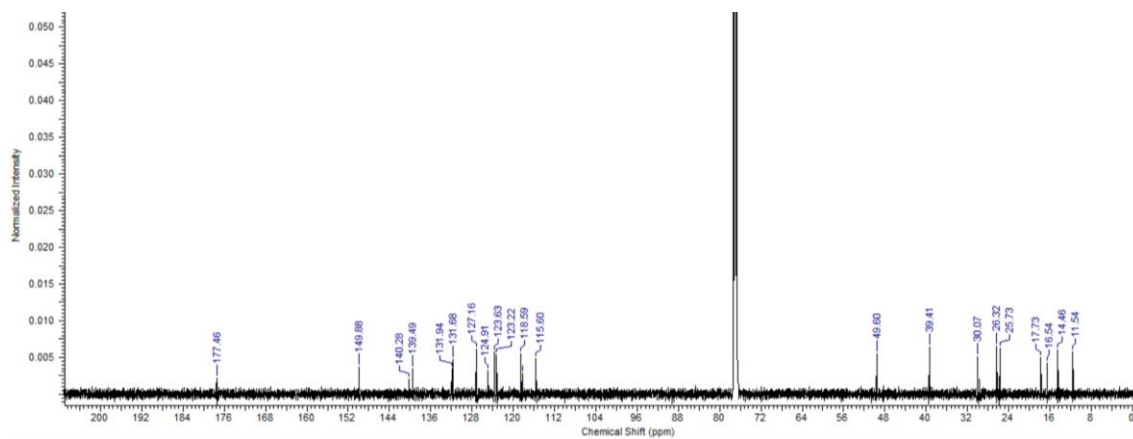

Supplement: EJOC-2016-5799-s001.pdf [file EJOC-2016-5799-s001.pdf]
